# Supplementary material for: Future Premature Mortality Due to O3, Secondary Inorganic Aerosols and Primary PM in Europe — Sensitivity to Changes in Climate, Anthropogenic Emissions, Population and Building Stock
Source: Int J Environ Res Public Health. 2015 Mar 4;12(3):2837–69. doi: 10.3390/ijerph120302837 (PMC4377936; doi:10.3390/ijerph120302837)
Supplement: Supplementary File 1 [file ijerph-12-02837-s001.pdf]

## Future Premature Mortality due to O<sub>3</sub>, Secondary Inorganic Aerosols and Primary PM in Europe — Sensitivity to Changes in Climate, Anthropogenic Emissions, Population and Building stock

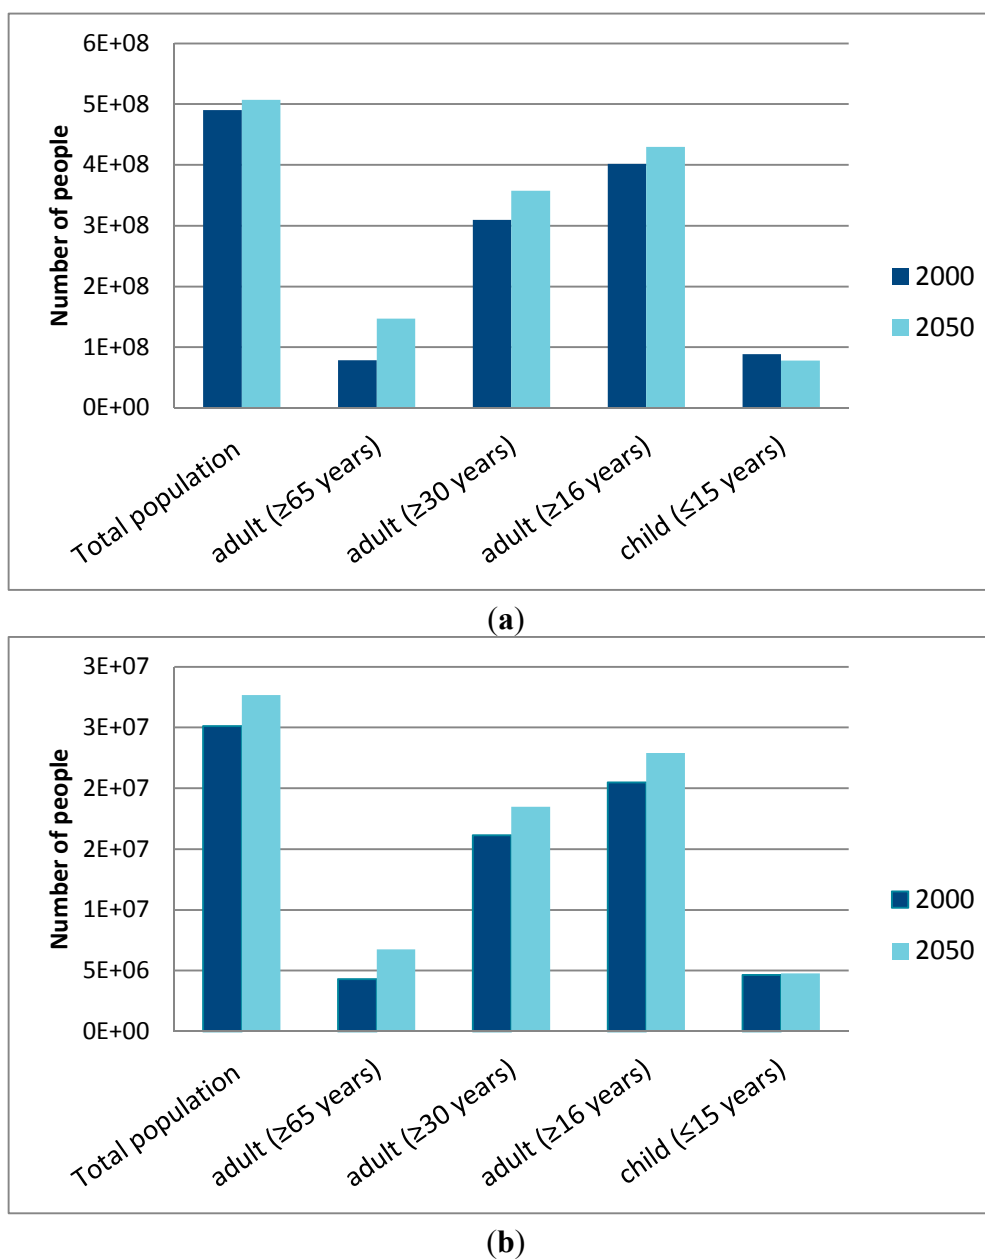

**Figure S1.** The applied population data sets for 2000 and 2050 (including the division into different age classes). **(a)** is the total numbers for Europe and **(b)** is the total numbers for the Nordic region (Sweden, Norway, Finland and Denmark).

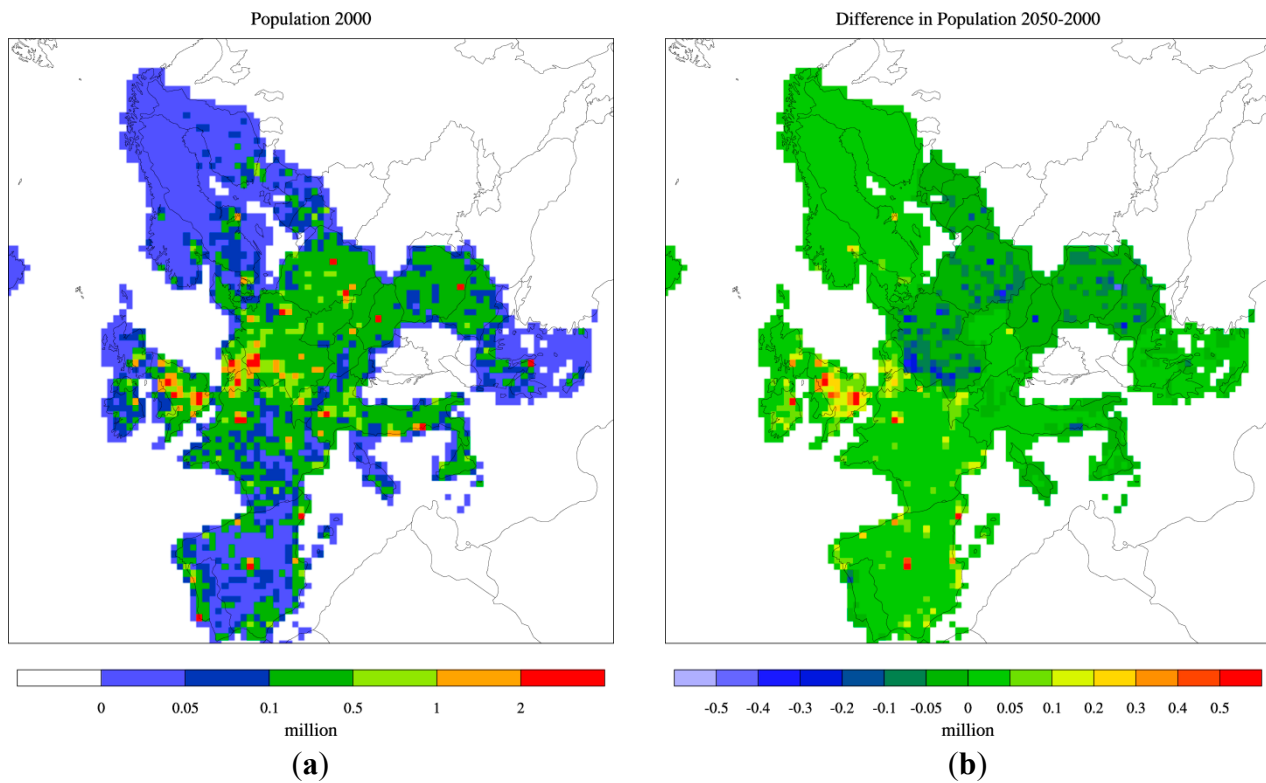

**Figure S2.** The applied distribution of the population across Europe for year 2000 **(a)**. The absolute difference between the population data for 2050 and 2000 is shown in **(b)**. Based on data and projections for 30 countries. From: <http://www.integrated-assessment.eu/>.
